# Supplementary material for: The β-arrestin1/endothelin axis bolsters ovarian fibroblast-dependent invadosome activity and cancer cell metastatic potential
Source: PubMed Central journal article supplement (PMC11111729; doi:10.1038/s41419-024-06730-6), 2024-05-22

**Fig 1A**

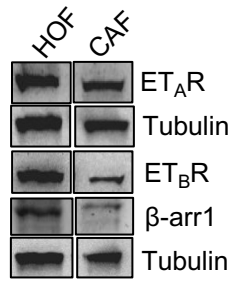

ET<sub>A</sub>R  
55 kDa

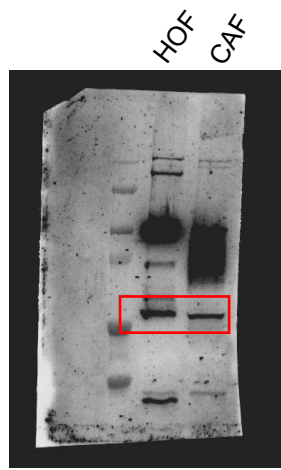

Tubulin  
52 kDa

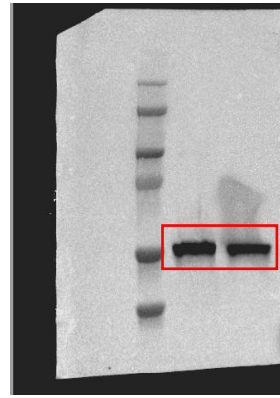

ET<sub>B</sub>R  
55 kDa

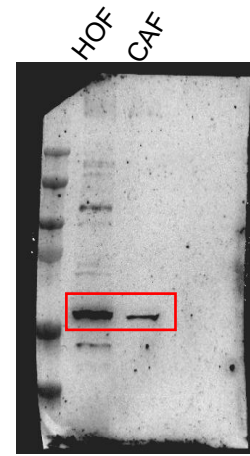

β-arr1  
50 kDa

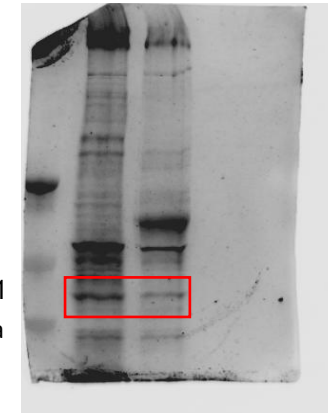

Tubulin  
52 kDa

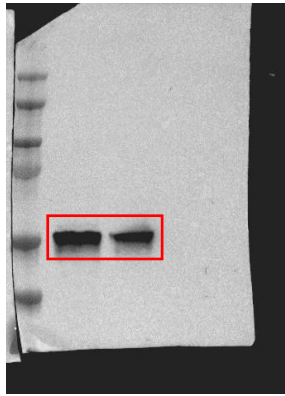

**Fig 2B**

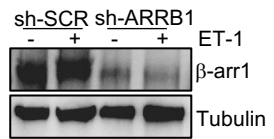

β-arr1  
50 kDa

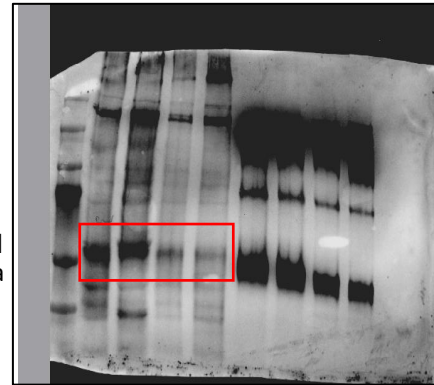

Tubulin  
52 kDa

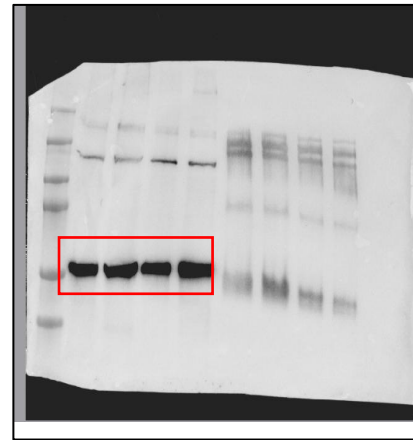

**Fig.4A**

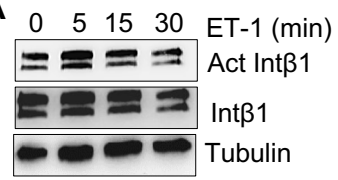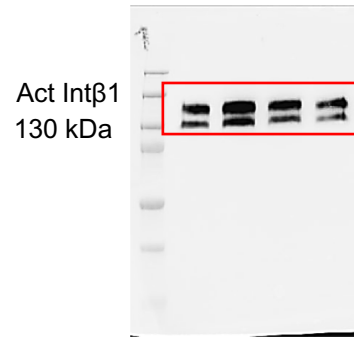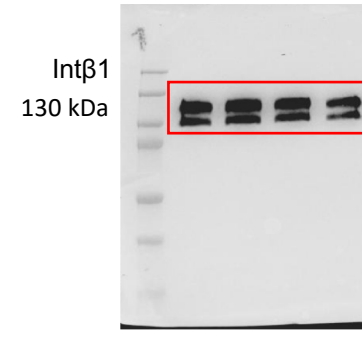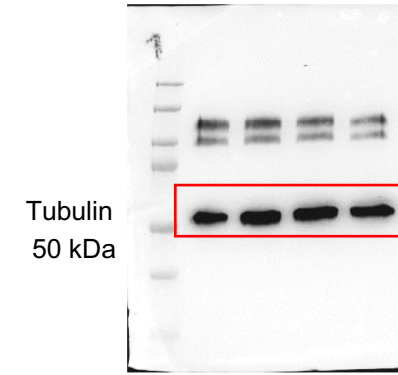

**Fig.4B**

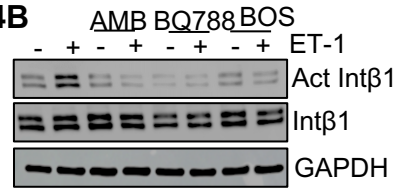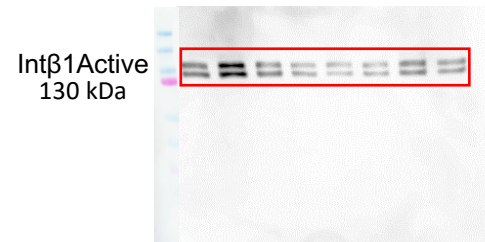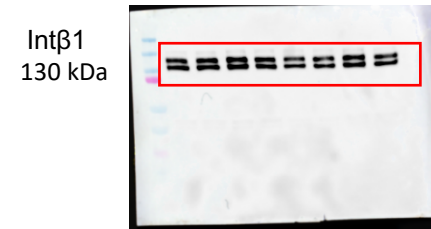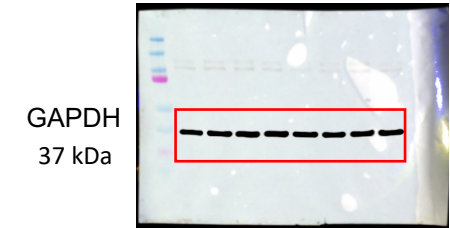

Fig 5A

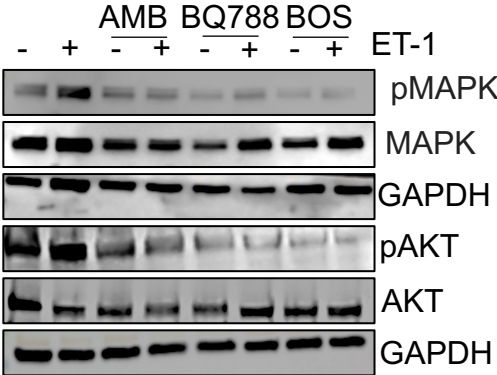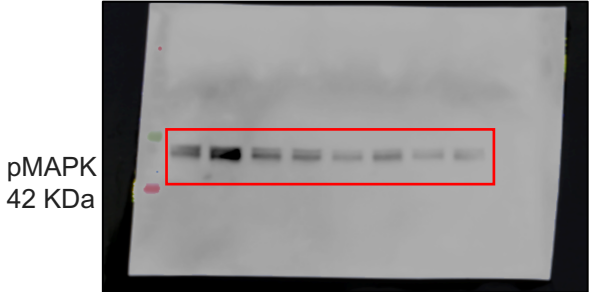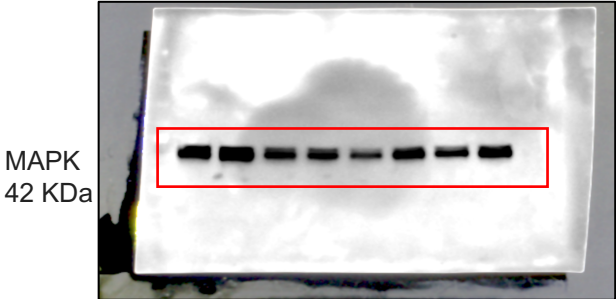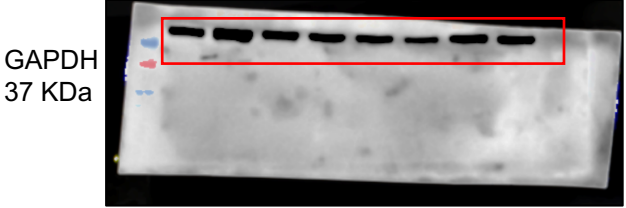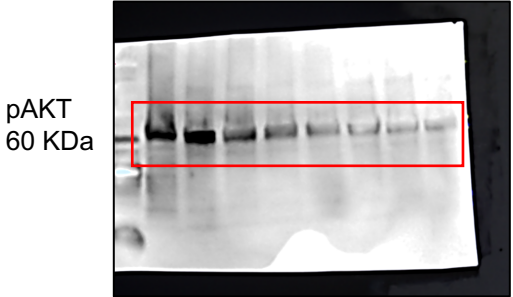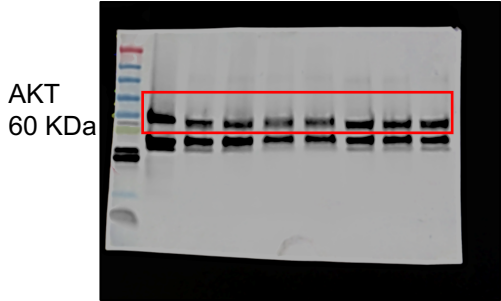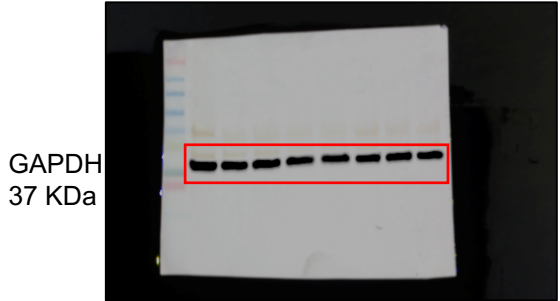

Fig 7B

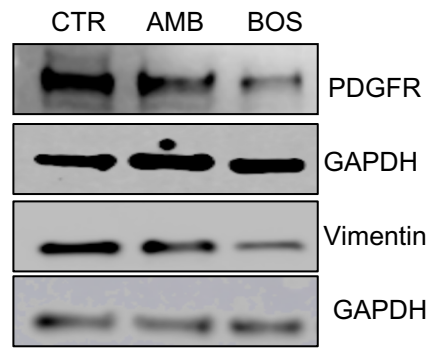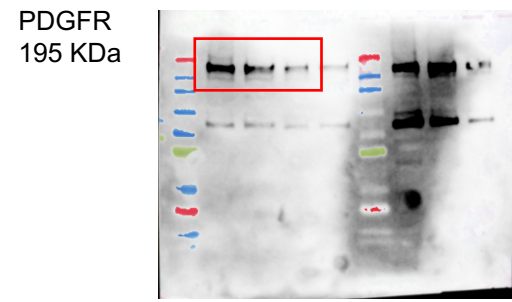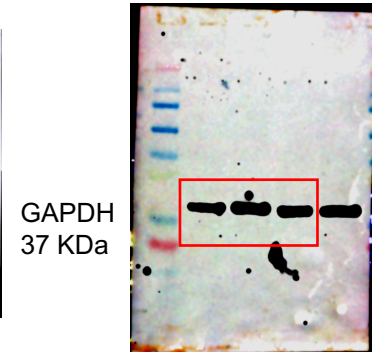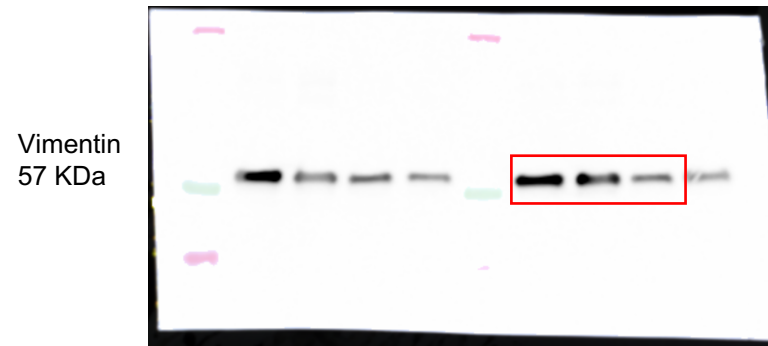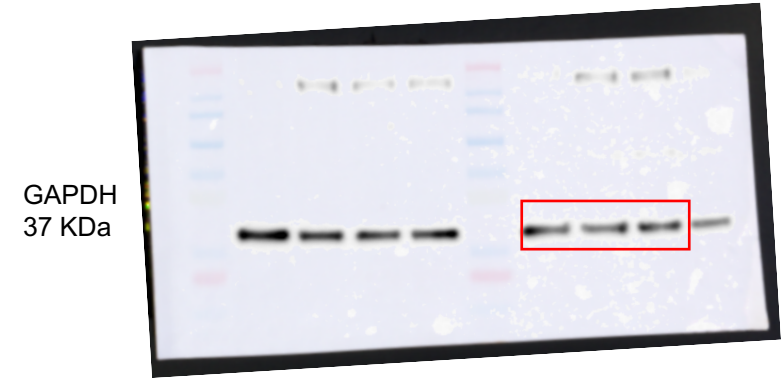

Suppl. fig. 1A

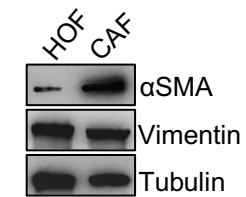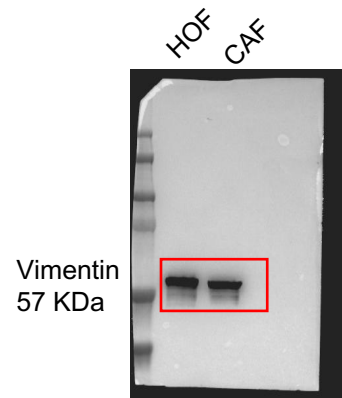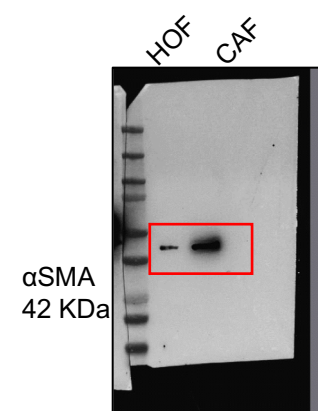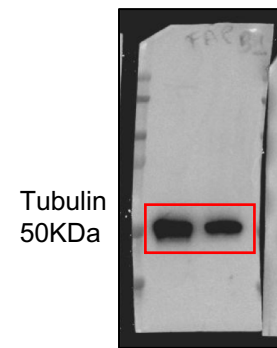

Suppl. fig. 1C

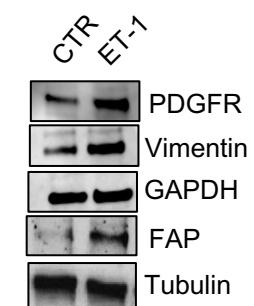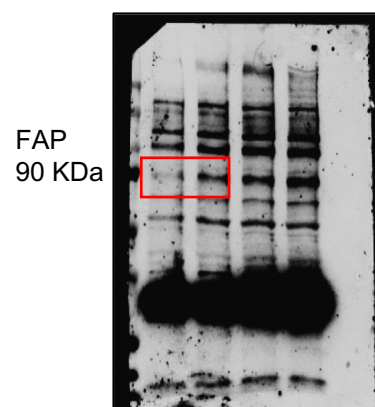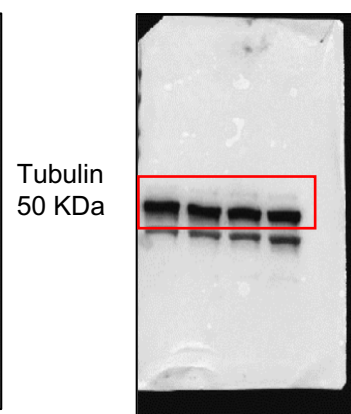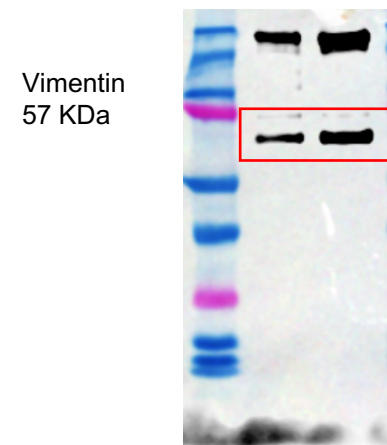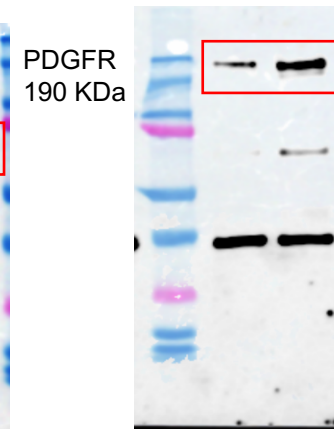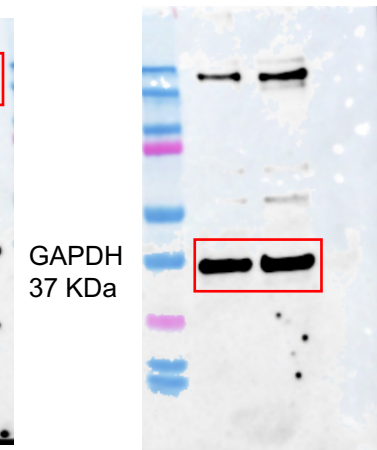

Suppl. fig. 1D

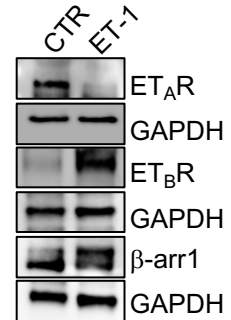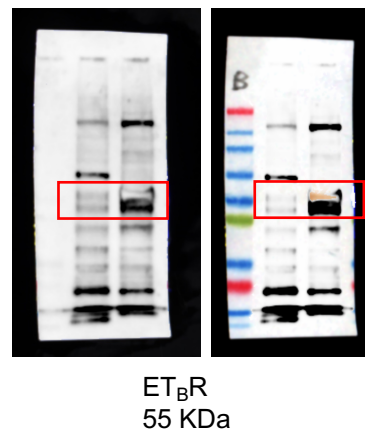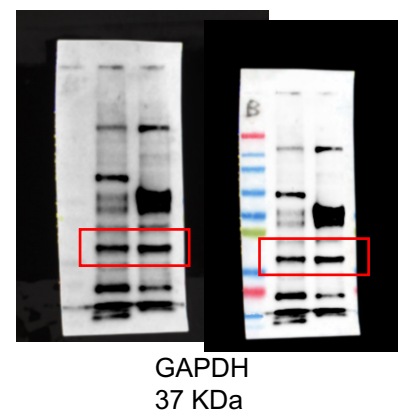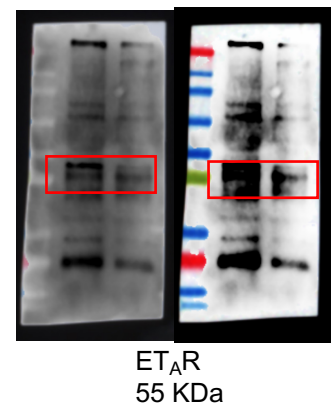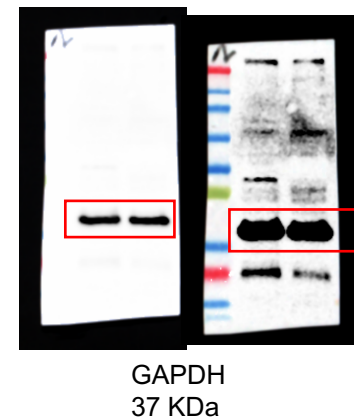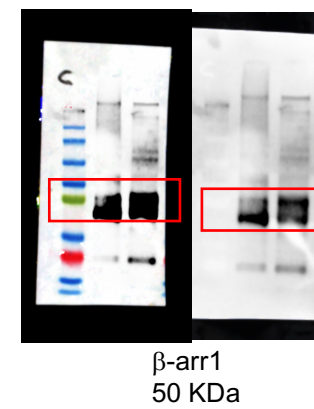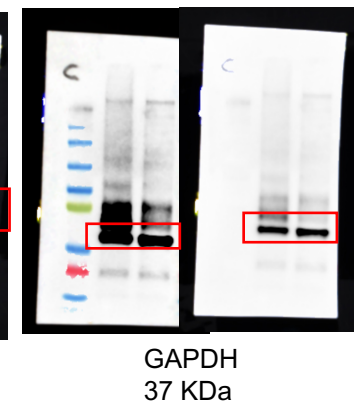

### Suppl. fig. 3B

+ARRB1  
-FLAG  
sh-SCR sh-ARRB1

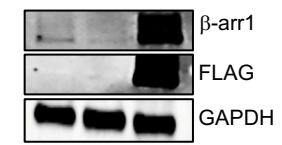

$\beta$ -arr1  
FLAG  
GAPDH

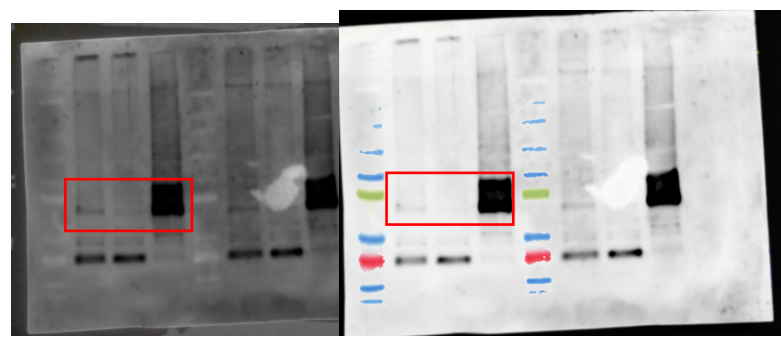

$\beta$ -arr1  
50 KDa

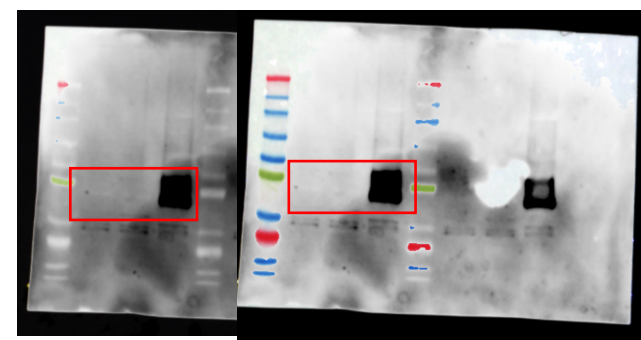

$\beta$ -arr1-FLAG  
50 KDa

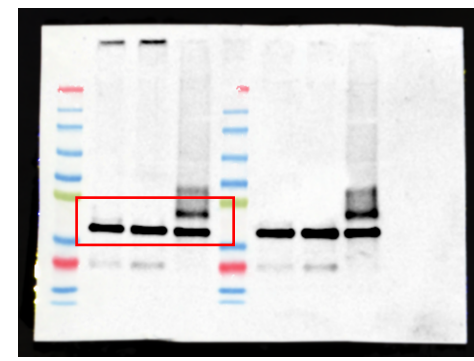

GAPDH  
37 KDa

### Suppl. fig. 4A

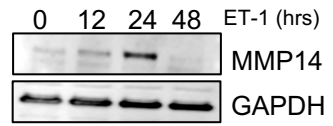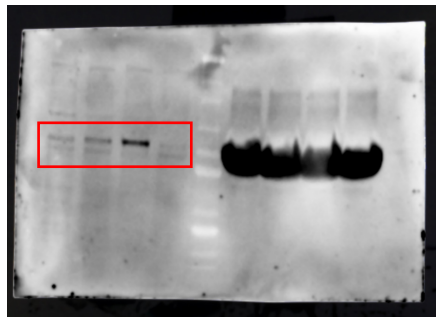

MMP14 60KDa

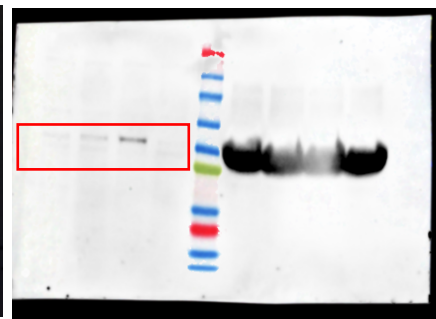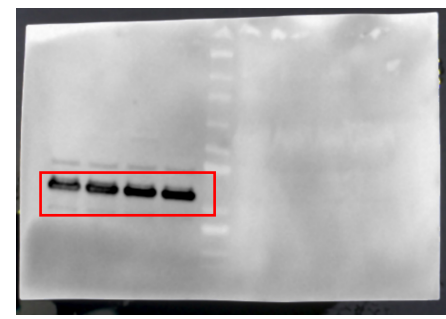

GAPDH 37 KDa

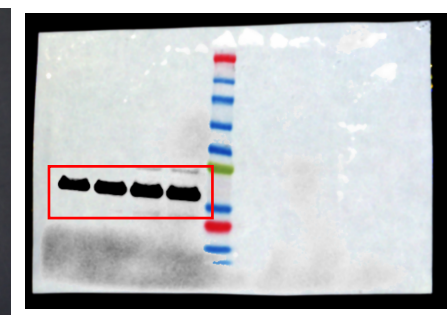

### Suppl. fig. 4B

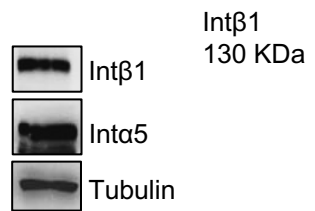

Intβ1  
130 KDa

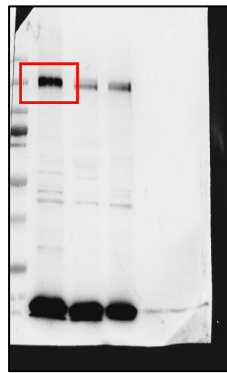

Intα5  
116 KDa

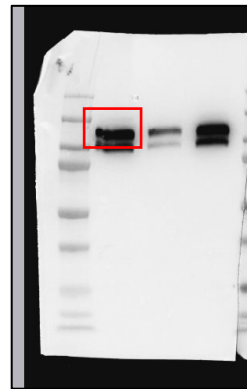

Tubulin  
50 KDa

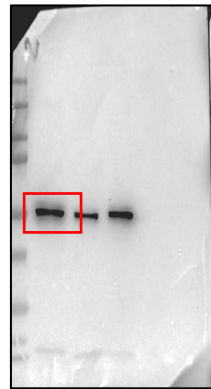

### Suppl. fig. 4D

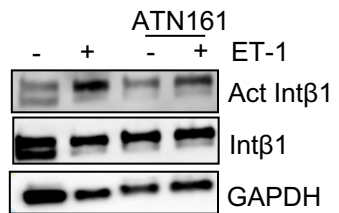

Act Intβ1  
130 KDa

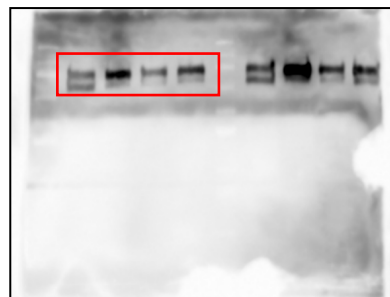

Intβ1  
130 KDa

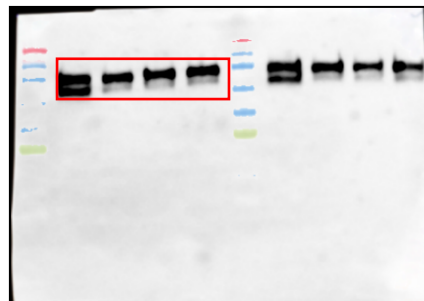

GAPDH  
37 KDa

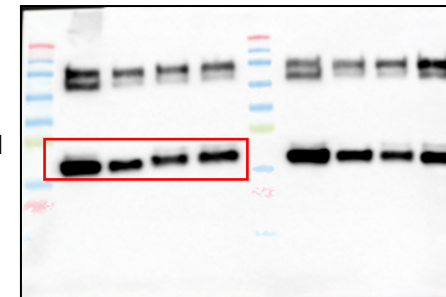

Suppl. fig.5A

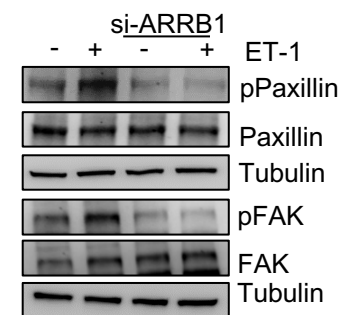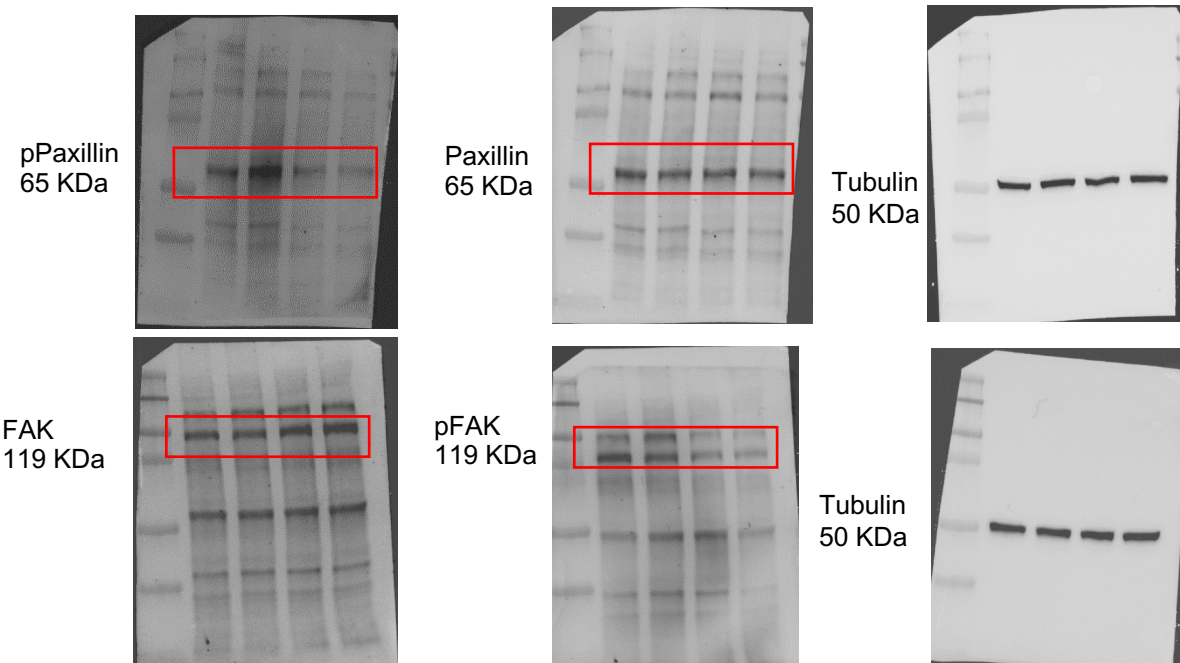

Suppl. fig.5B

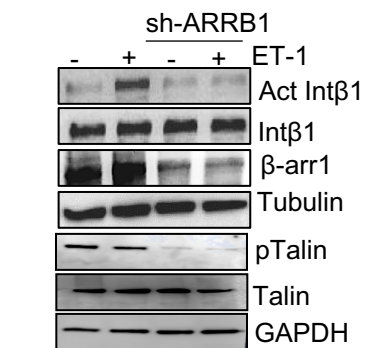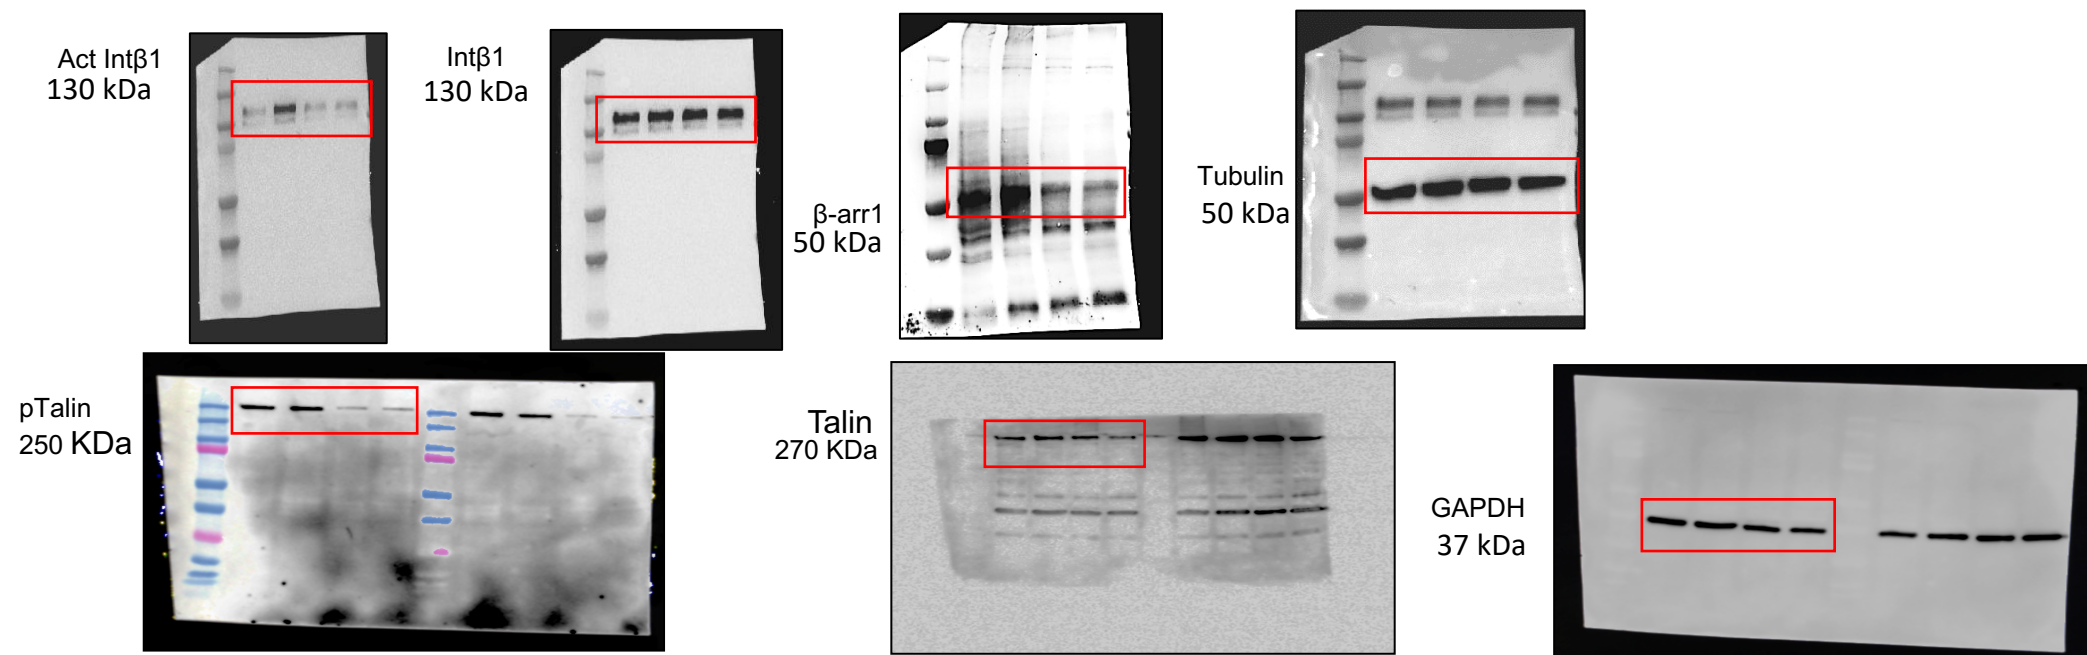



Suppl. fig.6F

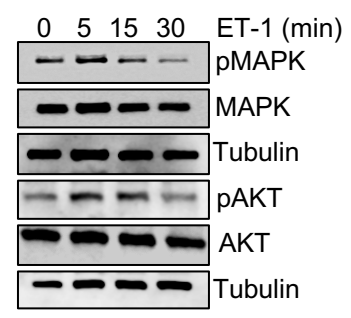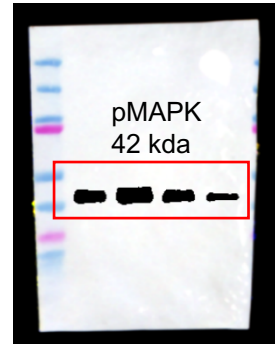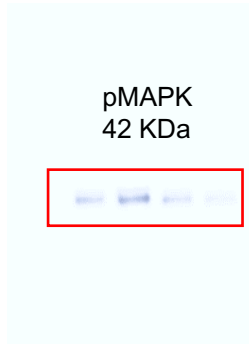

Tubulin  
50 KDa

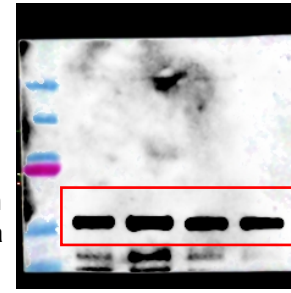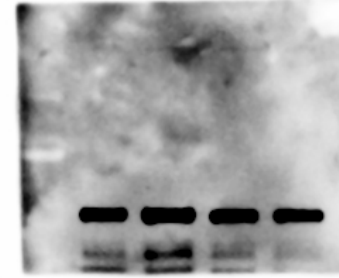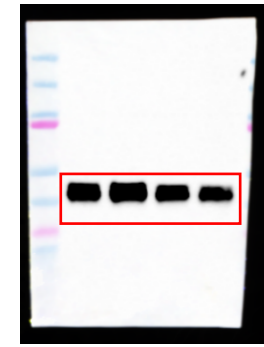

Tubulin  
50 KDa

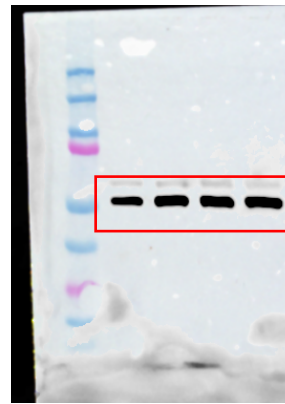

pAKT  
62 KDa

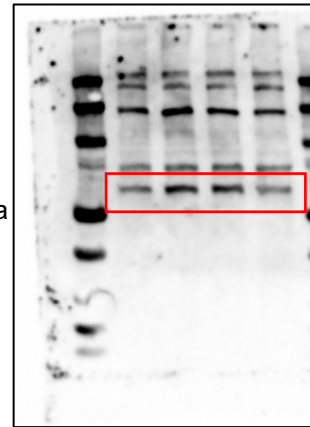

AKT  
62 KDa

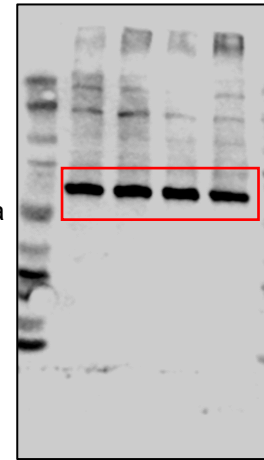

Suppl. fig. 7A

**A**

| Kuramochi        |          | OVCA433 |          |
|------------------|----------|---------|----------|
| Sh-SCR           | Sh-ARRB1 | Sh-SCR  | Sh-ARRB1 |
|                  |          |         |          |
| β-arr1<br>50 kDa |          |         |          |
|                  |          |         |          |
| GAPDH            |          |         |          |

Kuramochi OVCA433

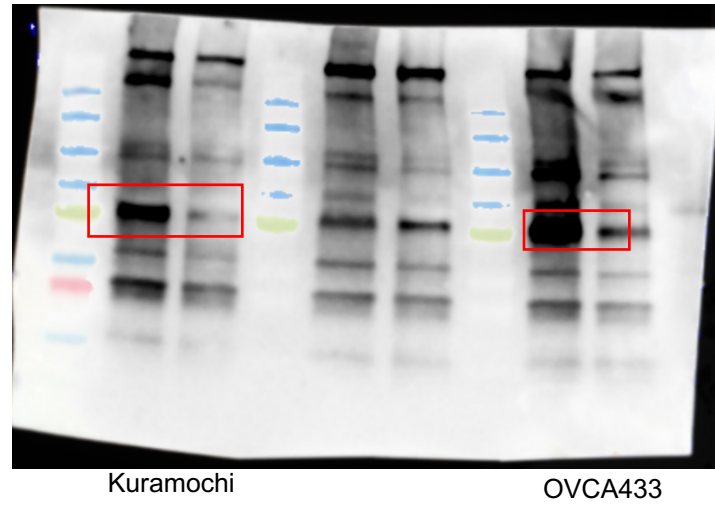

GAPDH  
37KDa

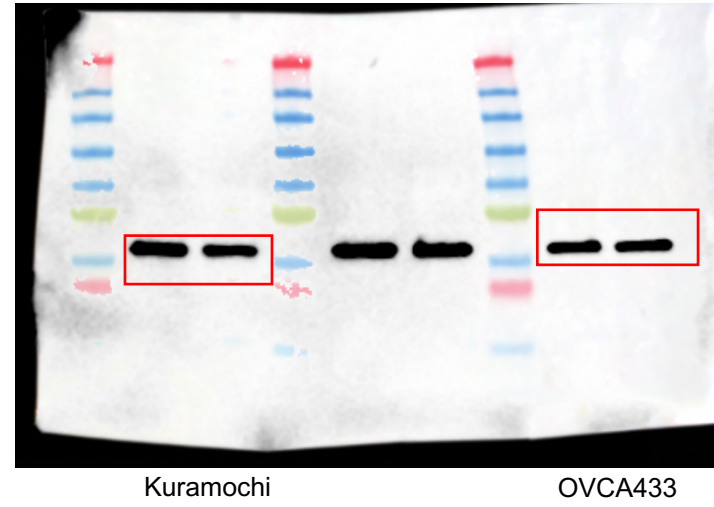

Supplement: 41419_2024_6730_MOESM2_ESM.pdf [file 41419_2024_6730_MOESM2_ESM.pdf]
